# Supplementary material for: Novel Antimicrobial Peptides Designed Using Recurrent Neural Network Reduce Mortality in Experimental Sepsis
Source: Research Square preprint supplement (doi:10.21203/rs.3.rs-1128449/v1), 2021-12-10
Supplement: Supplementary file 1 [file 7856541d4ffe2ce3880081bf.docx]

Table S1. MIC values calculations against *K. aerogenes.*

| isolate # | PEP-38 — 1st MIC | PEP-38 — 2nd MIC | PEP-38 — 3rd MIC | Median PEP-38 MIC |  | PEP-138 — 1st MIC | PEP-138— 2nd MIC | PEP-138 — 3rd MIC | Median PEP-138 MIC |
| --- | --- | --- | --- | --- | --- | --- | --- | --- | --- |
| 1 | 16 | 16 | 8 | 16 |  | 2 | 2 | 1 | 2 |
| 2 | 2 | 4 | 4 | 4 |  | 0,5 | 0,5 | 1 | 0,5 |
| 3 | 8 | 16 | 8 | 8 |  | 2 | 1 | 1 | 1 |
| 4 | 4 | 4 | 2 | 4 |  | 0,5 | 1 | 1 | 1 |
| 5 | 16 | 8 | 16 | 16 |  | 1 | 1 | 2 | 1 |
| 6 | 8 | 8 | 8 | 8 |  | 2 | 4 | 4 | 4 |
| 7 | 2 | 2 | 4 | 2 |  | 2 | 4 | 2 | 2 |
| 8 | 8 | 8 | 8 | 8 |  | 2 | 2 | 2 | 2 |
| 9 | 8 | 4 | 4 | 4 |  | 2 | 2 | 2 | 2 |
| 10 | 8 | 8 | 8 | 8 |  | 4 | 4 | 2 | 4 |
| 11 | 4 | 2 | 4 | 4 |  | 0,5 | 2 | 2 | 2 |
| 12 | 4 | 4 | 4 | 4 |  | 4 | 8 | 4 | 4 |
| Median |  |  |  | 6 |  |  |  |  | 2 |
| First quartile (25) |  |  |  | 4 |  |  |  |  | 1 |
| Third quartile (75) |  |  |  | 8 |  |  |  |  | 2,5 |

Table S2. MIC values calculations against *K. pneumoniae.*

| isolate # | PEP-38 — 1st MIC | PEP-38 — 2nd MIC | PEP-38 — 3rd MIC | Median PEP-38 MIC |  | PEP-138 — 1st MIC | PEP-138— 2nd MIC | PEP-138 — 3rd MIC | Median PEP-138 MIC |
| --- | --- | --- | --- | --- | --- | --- | --- | --- | --- |
| 1 | 8 | 32 | 16 | 16 |  | 4 | 2 | 4 | 4 |
| 2 | 8 | 8 | 8 | 8 |  | 2 | 1 | 1 | 1 |
| 3 | 4 | 8 | 8 | 8 |  | 1 | 1 | 1 | 1 |
| 4 | 2 | 4 | 4 | 4 |  | 1 | 1 | 1 | 1 |
| 5 | 4 | 4 | 4 | 4 |  | 0,5 | 1 | 1 | 1 |
| 6 | 4 | 4 | 4 | 4 |  | 2 | 1 | 1 | 1 |
| 7 | 4 | 4 | 4 | 4 |  | 4 | 4 | 2 | 4 |
| 8 | 4 | 4 | 8 | 4 |  | 4 | 4 | 4 | 4 |
| 9 | 8 | 8 | 8 | 8 |  | 2 | 2 | 2 | 2 |
| 10 | 16 | 32 | 32 | 32 |  | 8 | 4 | 8 | 8 |
| 11 | 32 | 32 | 32 | 32 |  | 0,5 | 0,5 | 0,5 | 0,5 |
| 12 | 16 | 8 | 8 | 8 |  | 1 | 2 | 1 | 1 |
| 13 | 0,5 | 0,5 | 0,5 | 0,5 |  | 0,25 | 0,25 | 0,5 | 0,25 |
| 14 | 2 | 2 | 8 | 2 |  | 1 | 4 | 4 | 4 |
| 15 | 8 | 8 | 8 | 8 |  | 2 | 2 | 2 | 2 |
| 16 | 4 | 4 | 4 | 4 |  | 4 | 2 | 2 | 2 |
| 17 | 8 | 8 | 4 | 8 |  | 2 | 2 | 2 | 2 |
| 18 | 16 | 32 | 16 | 16 |  | 2 | 4 | 4 | 4 |
| Median |  |  |  | 8 |  |  |  |  | 2 |
| First quartile (25) |  |  |  | 4 |  |  |  |  | 1 |
| Third quartile (75) |  |  |  | 8 |  |  |  |  | 4 |

Table S3. MIC values calculations against *P. aeruginosa.*

| isolate # | PEP-38 — 1st MIC | PEP-38 — 2nd MIC | PEP-38 — 3rd MIC | Median PEP-38 MIC |  | PEP-138 — 1st MIC | PEP-138— 2nd MIC | PEP-138 — 3rd MIC | Median PEP-138 MIC |
| --- | --- | --- | --- | --- | --- | --- | --- | --- | --- |
| 1 | R | R | R | R |  | 4 | 4 | 4 | 4 |
| 2 | R | R | R | R |  | 2 | 2 | 4 | 2 |
| 3 | R | R | R | R |  | 2 | 4 | 4 | 4 |
| 4 | R | R | R | R |  | 2 | 4 | 4 | 4 |
| 5 | R | R | R | R |  | 2 | 2 | 4 | 2 |
| 6 | R | R | R | R |  | 4 | 4 | 2 | 4 |
| 7 | R | R | R | R |  | 2 | 2 | 2 | 2 |
| 8 | R | R | R | R |  | 0,5 | 1 | 1 | 1 |
| 9 | R | R | R | R |  | 4 | 2 | 2 | 2 |
| 10 | R | R | R | R |  | 2 | 2 | 2 | 2 |
| 11 | R | R | R | R |  | 2 | 2 | 2 | 2 |
| 12 | R | R | R | R |  | 1 | 2 | 4 | 2 |
| 13 | R | R | R | R |  | 2 | 2 | 2 | 2 |
| 14 | R | R | R | R |  | 2 | 2 | 1 | 2 |
| 15 | R | R | R | R |  | 1 | 2 | 4 | 2 |
| 16 | R | R | R | R |  | 4 | 4 | 2 | 4 |
| 17 | R | R | R | R |  | 4 | 4 | 4 | 4 |
| Median |  |  |  |  |  |  |  |  | 2 |
| First quartile (25) |  |  |  |  |  |  |  |  | 2 |
| Third quartile (75) |  |  |  |  |  |  |  |  | 4 |

a R – resistant to 8 μg/ml of PEP-38.

Table S4. Survival proportions (%) in all experimental animal groups.

| Days after infecting | Control (n=12) | PEP-36 (n=12) | PEP-38 (n=12) | PEP-137 (n=12) |
| --- | --- | --- | --- | --- |
| 0 | 100 | 100 | 100 | 100 |
| 1 | 66,7 | 91,7 | 66,7 | 91,7 |
| 2 | 16,7 | 75 | 41,7 | 66,7 |
| 3 | 0 | 66,7 | 8,3 | 50 |
| 5 |  | 66,7 | 8,3 | 50 |

Figure S1. Probability of survival: control vs PEP-36.

Figure S2. Probability of survival: control vs PEP-38.

Figure S3. Probability of survival: control vs PEP-137.
